# Supplementary material for: A Combinatorial Amino Acid Code for RNA Recognition by Pentatricopeptide Repeat Proteins
Source: PubMed Central journal article supplement (PMC3420917; doi:10.1371/journal.pgen.1002910), 2012-08-16
Supplement: pgen.1002910.s001.pdf [file pgen.1002910.s001.pdf]

|                                                                                                                                                 |                                                                                                                               |                                                                                                                                       |
|-------------------------------------------------------------------------------------------------------------------------------------------------|-------------------------------------------------------------------------------------------------------------------------------|---------------------------------------------------------------------------------------------------------------------------------------|
| CRR4 ndhD(117166) [1]<br>LPPLSSSSSPLSPLS<br>STNSNNNNANVVNV<br>NDDDDNDDDDGSD<br>:: :::: : :<br>ugguguaucuuugucuuuaccaC                           | OTP82 ndhB(95644) [6]<br>PLSSPLSPLSPLS<br>NPPTNVNLLTNVG<br>NDDDDNDNASDK<br>x .:. x: x.<br>aaaguagcugcuucagcuuC                | MEF1 rps4(82161) [11]<br>LSPLSPLSPLS<br>CNSPSSSSNLA<br>ISDDNNSNNT<br>.x .x xx<br>cuaccuacucauuuuC                                     |
| CRR21 ndhD(116785) [2]<br>PLSPLSPLSPLSPPPLSPLS<br>FGTAPSNSTNASNNTTNTG<br>GNNDCNTDDDDNNNLEDC<br>x. . . . : : : : : :<br>caauguacagcggucaaaaggauC | OTP82 ndhG [6]<br>PLSSPLSPLSPLS<br>NPPTNVNLLTNVG<br>NDDDDNDNASDK<br>: .:: : : x:<br>cuuuuaguuuuucugggauC                      | MEF1 nad7(137931) [11]<br>LSPLSPLSPLS<br>CNSPSSSSNLA<br>ISDDNNSNNT<br>. . . . : :<br>auacagaagguuuuuC                                 |
| CLB19 rpoA(78691) [3]<br>PLSSPLSPLS<br>TITNTINNTG<br>TNHNDNTDR<br>: : : : x.<br>uguauuacacgugcaaaaC                                             | CRR28 ndhB(96998) [7]<br>SPLSPLSPLS<br>GN.NN.NN<br>SD.SD.DN<br>. . : : x:<br>cuauuuuguagcucC                                  | MEF1 nad2(329886) [11]<br>LSPLSPLSPLS<br>CNSPSSSSNLA<br>ISDDNNSNNT<br>xx . . x:<br>aaaacgaaucuuuuC                                    |
| CLB19 clpP(69942) [3]<br>PLSSPLSPLS<br>TITNTINNTG<br>TNHNDNTDR<br>: :x: . .<br>agcaacagaagcccaagcuC                                             | CRR28 ndhD(116281) [7]<br>SPLSPLSPLS<br>GN.NN.NN<br>SD.SD.DN<br>. . .x x:<br>uaauuuuagcagcuuC                                 | YS1 rpoB(25992) [12]<br>PLSPLSPLSPLSPLS<br>NPNTVSNLNNNMTTVG<br>DDNNNDWTNDDDDDE<br>x x: x: .: : : : :<br>aaugaaucuccuuggaacuuC         |
| LPA66 psbF(63985) [4]<br>SPLSSPLSPLS<br>ANPSNNVSSIG<br>NNDSDNSR<br>xx . . : .x<br>cuagcuguaccuaccguuuC                                          | CRR22 ndhB(96419) [7]<br>SPLSPLSPLSPLSPLS<br>THTTNTVNMNVTNLG<br>LVDDSLTNTDHNHS<br>.x x. x. .: .:<br>caagcuuuccuagcccuuC       | REME1 nad2-558 [13]<br>LSPLSPLSPLS<br>SNTSSNTNSVG<br>MNNDDEDDNV<br>: : . . . .<br>gaucuuaggugcauuuuC                                  |
| OTP80 rpl23 [5]<br>SPLSSPLSPLS<br>FTTLTTVNN<br>NDSDDNSDN<br>: : : : : :<br>augcgaaucaggauC                                                      | CRR22 ndhD(116281) [7]<br>SPLSPLSPLSPLSPLS<br>THTTNTVNMNVTNLG<br>LVDDSLTNTDHNHS<br>xx : . . . . : :<br>uuauagcagcuucaacaucucC | REME1 orfX-552 [13]<br>LSPLSPLSPLS<br>SNTSSNTNSVG<br>MNNDDEDDNV<br>: : xx . .<br>cauuccaucgguaugcucC                                  |
| OTP81 rps12(69553) [5]<br>SPLSPLSPLSPLSPLS<br>SNPNNVNTNVSS<br>NNDDSDNDNNDN<br>.x . . :x: . .<br>ggaaaauuuuuuugaaaauC                            | CRR22 rpoB(25779) [7]<br>SPLSPLSPLSPLSPLS<br>THTTNTVNMNVTNLG<br>LVDDSLTNTDHNHS<br>. . x. . . . : :<br>aaauucuuuuuaguuuauC     | SLO1 nad4(162141) [14]<br>PLSPLSPLSPLSPLS<br>NPNNTNITTTIS<br>DVDDTTDDNNDQ<br>: . . . :x . . : :<br>guuuuuuccgaaagcgugcC               |
| OTP84 ndhB(94999) [5]<br>PLSPLSPLSPLSPLSPLS<br>IPNNVNNSSNANNMSNIA<br>SDSNSNDDNKNDNDNNS<br>x. x: .: : : : :<br>augugugauagcaucauacC              | RARE1 accD(57868) [8]<br>PLSPLSPLSPLSPLS<br>NQNTTTTSTSTSTID<br>SSNPKNKDNNSDNT<br>. x. .: :x : :<br>guucagaaagaaucgagcuuC      | SLO1 nad9(23908) [14]<br>PLSPLSPLSPLSPLS<br>NPNNTNITTTIS<br>DVDDTTDDNNDQ<br>x : : .: : : : :<br>ucuauuuccaagcggcgC                    |
| OTP84 ndhF(112349) [5]<br>PLSPLSPLSPLSPLSPLS<br>IPNNVNNSSNANNMSNIA<br>SDSNSNDDNKNDNDNNS<br>: . . . : : : : : :<br>cgauccacuacuucuuuuuagcuC      | MEF11 cox3(218701) [9,10]<br>LSPLSPLSPLSPLS<br>GNTPCNCNCSSNV<br>PNNDNDNSTNNG<br>x: : : : : :<br>ucuuaauaccCuauuuccC           | MEF18 nad4(167599) [15]<br>LSSSLSSPLSPLSPLS<br>VNNATATNGVANNVANVG<br>TNSNRNDSYHDDNTND<br>. .x : . . : : : x:<br>uuccucauaaaauuccgguuC |
| OTP84 psbZ(35800) [5]<br>PLSPLSPLSPLSPLSPLS<br>IPNNVNNSSNANNMSNIA<br>SDSNSNDDNKNDNDNNS<br>x. : : .: x: .: :<br>uuuugcauuuuuuuacuucC             | MEF11 nad4(161816) [9,10]<br>LSPLSPLSPLSPLS<br>GNTPCNCNCSSNV<br>PNNDNDNSTNNG<br>x: : x :x<br>gacCgauacgauuuuuuagguC           | MEF19 ccb206(31028) [15]<br>SPLSPLSPLSPLS<br>SNPTGTNLCFLG<br>SDNNNTDDDDT<br>x: xx .: : :<br>ucuuuCaucGauugguuuuC                      |
| OTP85 ndhD(116494) [5]<br>SPLSPLSPLS<br>ANPPNLTS<br>DDNCNYDD<br>x: : :x<br>cuuuugccgucaaaC                                                      | MEF11 ccb203(257133) [9,10]<br>LSPLSPLSPLSPLS<br>GNTPCNCNCSSNV<br>PNNDNDNSTNNG<br>x: : x : :<br>ucuuaauuuuugacuuuucC          | MEF21 cox3(218536) [15]<br>SPLSSPLSPLS<br>TNPNTINSLG<br>NDHDTQDNK<br>: . : : : :<br>uaggacCucgauuagguuC                               |

MEF22 nad3(260858) [15]  
SPLSPLSPLSPLS  
TNPNTVINTSSLA  
QDDTDENDDDDNQ  
xx x: : ..  
gaauugguuucgauccuuC

MEF9 nad7(133233) [16]  
SSSPLSSSSPLSPLS  
NNNSANNNTNNVS  
DDNLLNDDHDESO  
::: x::: ..  
ucuucaagcuuuaccuuuuC

MEF14 matR-1895 [17]  
PLSPLSPLSPLS  
NPSTVNNSTTVG  
TDNDGDNDNNG  
x x. : : :  
cucaaguacuccaaagacuC

OTP87 atp1(302512) [18]  
SPLSPLSPLSPLSPLSPLS  
KNGSNSTTTANCSAASSSTVV  
DNYNDDSNDRDDDDGDEDE  
: .: .: xx .x x. : :  
gcuauagaaacaaguaucgguaguuc

OTP87 nad7(132094) [18]  
SPLSPLSPLSPLSPLSPLS  
KNGSNSTTTANCSAASSSTVV  
DNYNDDSNDRDDDDGDEDE  
: xx x. x: . . . : :  
ccaugacgacuaggaaggaagcauuC

MEF7 ccb206-28 [19]  
SPLSPLSPLSPLSPLSPLS  
NAVNNGSNLNNINNSNASVVS  
DNDNDTNSMDGNDNEDDDNDR  
x. x. . . : . : : x . .  
ugagacgacuuuuucugaacuauauC

MEF7 cob-325 [19]  
SPLSPLSPLSPLSPLSPLS  
NAVNNGSNLNNINNSNASVVS  
DNDNDTNSMDGNDNEDDDNDR  
: x . . xx : . . : : x x.  
accuucuuuuuucguggucuuauuC

MEF7 nad2-1433 [19]  
SPLSPLSPLSPLSPLSPLS  
NAVNNGSNLNNINNSNASVVS  
DNDNDTNSMDGNDNEDDDNDR  
xx x. . . : . : : : :  
agcaagacuuccuuuuuacuauuauC

MEF7 nad4L-41 [19]  
SPLSPLSPLSPLSPLSPLS  
NAVNNGSNLNNINNSNASVVS  
DNDNDTNSMDGNDNEDDDNDR  
: . : . . : . : : x : :  
auuuuacuuuuuauaguuuuuuC

SLG1 nad3(260757) [20]  
LSPLSPLSPLSPLSPLSPLS  
LKNANNANNINNNMGTTA  
DCDSDDNHDDDDDETNDDDT  
x. : : . : . : : :  
aaccuuuuuucuuuugggcaguac

MEF3 atp4-89 [21]  
SPLSPLSPLSPLS  
SNVPGIATATVA  
ENDDNDNSNDNNE  
.x x : : : :  
auuaaguucgaagaagacuC

PPR2263 nad5-1550 [22]  
SPLSPLSPLSPLSPLS  
TNASNATNVTNSTNL  
DDDDDDHDNDTNNNTG  
x: . . : : x: : .  
aguuuugcuguccaaccuuuac

MEF29 nad5-1550 [22]  
SPLSPLSPLSPLSPLS  
TNASNATNVTNSTNL  
DDNEDDHRHSNSNTS  
x: . . : . X: : .  
aguuuugcuguccaaccuuuac

PPR2263 cob-908 [22]  
SPLSPLSPLSPLSPLS  
TNASNATNVTNSTNL  
DDDDDDHDNDTNNNTG  
: x : : : : : :  
ggggugugagccgcaauagcacC

MEF29 cob-908 [22]  
SPLSPLSPLSPLSPLS  
TNASNATNVTNSTNL  
DDNEDDHRHSNSNTS  
: x : : . . : : : :  
ggggugugagccgcaauagcacC

PpPPR\_56 nad3 [23]  
LSPLSPLSPLSPLS  
VNNMTTVTNLTNVN  
DNSNDDDDDDND  
: : : : : :  
ugauuuggaugacuuuuuac

PpPPR\_56 nad4 [23]  
LSPLSPLSPLSPLS  
VNNMTTVTNLTNVN  
DNSNDDDDDDND  
x: x. : x : :  
ucgaauucguggacuauugC

PpPPR\_77 cox2 [23]  
LSPLSPLSPLSPLSPLS  
VNNINNTNLNLLNANTTG  
DDNDDDDDDNDGNDDDDDT  
: . : .x . . : : x.  
uacuaucuuuucguggacuauuac

PpPPR\_77 cox3 [23]  
LSPLSPLSPLSPLSPLS  
VNNINNTNLNLLNANTTG  
DDNDDDDDDNDGNDDDDDT  
x: : : .x .x : .x  
uggcuuugaagcagcugcuuugcuac

PpPPR\_91 nad5-2 [23]  
LSPLSPLSPLSPLSPLS  
GNSLTTVNSMTTNTNTG  
NDDNDNDNDNDNDNDNDND  
: . : : . : : : : :  
cugcacaauaggaugacuac

PpPPR\_71 ccmF-2 [24]  
LSPLSPLSPLSPLSPLS  
VNNLTNLTMTSINNNGV  
DNTSDDDDDDDDHDNT  
: . : : : : x : :  
uguuccacagggucuuuuuac

PpPPR\_78 rps14 [25]  
LSPLSPLSPLSPLSPLS  
NNMMNTITNVNTNNINNGV  
DTHDSDNDNDNDNDNDNDNT  
. : : : x : : : : : :  
uacguuauaguuuuuuuuuagcuC

PpPPR\_78 cox1 [25]  
LSPLSPLSPLSPLSPLSPLS  
NNMMNTITNVNTNNINNGV  
DTHDSDNDNDNDNDNDNT  
. x: : : : : x: : : :  
auccugaggucuaauuuuuuuC

PpPPR\_79 nad5-1 [25]  
LSPLSPLSPLSPLSPLS  
VNNVNTMTNTNTMNNVA  
DNSDDSDDDDDNDNDNT  
: : : x : x : : : : :  
guagacuuuucgacuauuuuugcuC

OGR1 cox2-C167 [26]  
LSPLSPLS  
STNVNNLG  
DDDNNTDN  
: : : :  
uuuuguuuuucguauC

OGR1 cox3-C572 [26]  
LSPLSPLS  
STNVNNLG  
DDDNNTDN  
: : : :  
uacuggcucuaguauC

OGR1 ccmC-C458 [26]  
LSPLSPLS  
STNVNNLG  
DDDNNTDN  
: : : :  
aacuggcuucuuuuuac

OGR1 nad2-C1457 [26]  
LSPLSPLS  
STNVNNLG  
DDDNNTDN  
: : : :  
aauggcagcaguuuac

OGR1 nad4-C401 [26]  
LSPLSPLS  
STNVNNLG  
DDDNNTDN  
: : : x.  
uaaugaucgcccguuac

OGR1 nad4-C416 [26]  
LSPLSPLS  
STNVNNLG  
DDDNNTDN  
: : : :  
ucugaucgugguac

OGR1 nad4-C433 [26]  
LSPLSPLS  
STNVNNLG  
DDDNNTDN  
: : : :  
cuacuauuucuuuuuac

## Figure S1

Alignments of PPR editing factors to their target sites. For each factor, the name of the protein and its editing site are listed, then successively the types of PPR motif, the amino acids at position 6, the amino acids at position 1', an indication of the degree to which these amino acids 'match' the RNA using the code developed in this work, and lastly the RNA sequence (in lower case). ':' and '.' indicate experimentally validated (see Figure 4) and computationally predicted (see Figure 3) matches, respectively. Mismatches are indicated by 'x'. All proteins are aligned such that the C-terminal S motif aligns with the nucleotide at -4 with respect to the edited C (indicated in upper case).

## References

1. Kotera E, Tasaka M, Shikanai T. 2005. A pentatricopeptide repeat protein is essential for RNA editing in chloroplasts. *Nature* 433(7023): 326-330.
2. Okuda K, Myouga F, Motohashi R, Shinozaki K, Shikanai T. 2007. Conserved domain structure of pentatricopeptide repeat proteins involved in chloroplast RNA editing. *Proc Natl Acad Sci U S A* 104(19): 8178-8183.
3. Chateigner-Boutin AL, Ramos-Vega M, Guevara-Garcia A, Andres C, de la Luz Gutierrez-Nava M, Cantero A, Delannoy E, Jimenez LF, Lurin C, Small I, Leon P. 2008. CLB19, a pentatricopeptide repeat protein required for editing of *rpoA* and *clpP* chloroplast transcripts. *Plant J* 56(4): 590-602.
4. Cai W, Ji D, Peng L, Guo J, Ma J, Zou M, Lu C, Zhang L. 2009. LPA66 is required for editing *psbF* chloroplast transcripts in Arabidopsis. *Plant Physiol* 150(3): 1260-1271.
5. Hammani K, Okuda K, Tanz SK, Chateigner-Boutin AL, Shikanai T, Small I. 2009. A study of new Arabidopsis chloroplast RNA editing mutants reveals general features of editing factors and their target sites. *Plant Cell* 21(11): 3686-3699.
6. Okuda K, Hammani K, Tanz SK, Peng L, Fukao Y, Myouga F, Motohashi R, Shinozaki K, Small I, Shikanai T. 2010. The pentatricopeptide repeat protein OTP82 is required for RNA editing of plastid *ndhB* and *ndhG* transcripts. *Plant J* 61(2): 339-49
7. Okuda K, Chateigner-Boutin AL, Nakamura T, Delannoy E, Sugita M, Myouga F, Motohashi R, Shinozaki K, Small I, Shikanai T. 2009. Pentatricopeptide repeat proteins with the DYW motif have distinct molecular functions in RNA editing and RNA cleavage in Arabidopsis chloroplasts. *Plant Cell* 21(1): 146-156.
8. Robbins JC, Heller WP, Hanson MR. 2009. A comparative genomics approach identifies a PPR-DYW protein that is essential for C-to-U editing of the Arabidopsis chloroplast *accD* transcript. *RNA* 15(6): 1142-1153.
9. Tang J, Kobayashi K, Suzuki M, Matsumoto S, Muranaka T. 2010. The mitochondrial PPR protein LOVASTATIN INSENSITIVE 1 plays regulatory roles in cytosolic and plastidial isoprenoid biosynthesis through RNA editing. *Plant J* 61(3): 456-466.
10. Verbitskiy D, Zehrmann A, van der Merwe JA, Brennicke A, Takenaka M. 2010. The PPR protein encoded by the LOVASTATIN INSENSITIVE 1 gene is involved in RNA editing at three sites in mitochondria of *Arabidopsis thaliana*. *Plant J* 61(3): 446-455.
11. Zehrmann A, Verbitskiy D, van der Merwe JA, Brennicke A, Takenaka M. 2009. A DYW domain-containing pentatricopeptide repeat protein is required for RNA editing at multiple sites in mitochondria of *Arabidopsis thaliana*. *Plant Cell* 21(2): 558-567.
12. Zhou W, Cheng Y, Yap A, Chateigner-Boutin AL, Delannoy E, Hammani K, Small I, Huang J. 2008. The Arabidopsis gene *YS1* encoding a DYW protein is required for editing of *rpoB* transcripts and the rapid development of chloroplasts during early growth. *Plant J* 58(1):82-96.
13. Bentolila S, Knight W, Hanson M. 2010. Natural variation in Arabidopsis leads to the identification of REME1, a pentatricopeptide repeat-DYW protein controlling the editing of mitochondrial transcripts. *Plant Physiol* 154(4): 1966-1982.
14. Sung TY, Tseng CC, Hsieh MH. 2010. The SLO1 PPR protein is required for RNA editing at multiple sites with similar upstream sequences in Arabidopsis mitochondria. *Plant J* 63(3): 499-511.
15. Takenaka M, Verbitskiy D, Zehrmann A, Brennicke A. 2010. Reverse genetic screening identifies five E-class PPR proteins involved in RNA editing in mitochondria of Arabidopsis thaliana. *J Biol Chem* 285(35): 27122-27129.

16. Takenaka M. 2010. MEF9, an E-subclass pentatricopeptide repeat protein, is required for an RNA editing event in the *nad7* transcript in mitochondria of *Arabidopsis*. *Plant Physiol* 152(2): 939-947.
17. Verbitskiy D, Härtel B, Zehrmann A, Brennicke A, Takenaka M. 2011. The DYW-E-PPR protein MEF14 is required for RNA editing at site matR-1895 in mitochondria of *Arabidopsis thaliana*. *FEBS Lett.* 585(4): 700-4.
18. Hammani K, des Francs-Small CC, Takenaka M, Tanz SK, Okuda K, Shikanai T, Brennicke A, Small I. 2011. The pentatricopeptide repeat protein OTP87 is essential for RNA editing of *nad7* and *atp1* transcripts in *Arabidopsis* mitochondria. *J Biol Chem* 286(24): 21361-71.
19. Zehrmann A, van der Merwe J, Verbitskiy D, Härtel B, Brennicke A, Takenaka M. 2012. The DYW-class PPR protein MEF7 is required for RNA editing at four sites in mitochondria of *Arabidopsis thaliana*. *RNA Biol* 9(2), in press
20. Yuan H, Liu D. 2012. Functional disruption of the pentatricopeptide protein SLG1 affects mitochondrial RNA editing, plant development, and responses to abiotic stresses in *Arabidopsis*. *Plant J* 70(3): 432-44.
21. Verbitskiy D, Merwe JA, Zehrmann A, Härtel B, Takenaka M. 2012. The E-class PPR protein MEF3 of *Arabidopsis thaliana* can also function in mitochondrial RNA editing with an additional DYW domain. *Plant Cell Physiol* 53(2): 358-67.
22. Sosso D, Mbelo S, Vernoud V, Gendrot G, Dedieu A, Chambrier P, Dauzat M, Heurtevin L, Guyon V, Takenaka M, Rogowsky PM. 2012. PPR2263, a DYW-Subgroup Pentatricopeptide Repeat Protein, Is Required for Mitochondrial *nad5* and *cob* Transcript Editing, Mitochondrion Biogenesis, and Maize Growth. *Plant Cell* 24(2): 676-91.
23. Ohtani S, Ichinose M, Tasaki E, Aoki Y, Komura Y, Sugita M. 2010. Targeted gene disruption identifies three PPR-DYW proteins involved in RNA editing for five editing sites of the moss mitochondrial transcripts. *Plant Cell Physiol* 51(11): 1942-1949.
24. Tasaki E, Hattori M, Sugita M. 2010. The moss pentatricopeptide repeat protein with a DYW domain is responsible for RNA editing of mitochondrial *ccmFc* transcript. *Plant J* 62(4): 560-70
25. Uchida M, Ohtani S, Ichinose M, Sugita C, Sugita M. 2011. The PPR-DYW proteins are required for RNA editing of *rps14*, *cox1* and *nad5* transcripts in *Physcomitrella patens* mitochondria. *FEBS Lett* 585(14): 2367-71.
26. Kim SR, Yang JI, Moon S, Ryu CH, An K, Kim KM, Yim J, An G. 2009. Rice OGR1 encodes a pentatricopeptide repeat-DYW protein and is essential for RNA editing in mitochondria. *Plant J* 59(5): 738-749.
