# Supplementary material for: A Combinatorial Amino Acid Code for RNA Recognition by Pentatricopeptide Repeat Proteins
Source: PubMed Central journal article supplement (PMC3420917; doi:10.1371/journal.pgen.1002910), 2012-08-16
Supplement: pgen.1002910.s003.pdf [file pgen.1002910.s003.pdf]

**Table S1. Alignments of PPR10 to the PPR10 RNA footprint ranked by p-value.**

The table shows the top 100 alignments out of the 29400 possible. The two alignments shaded in yellow correspond to the alignments depicted in Figure 2. Orientation: forward indicates N->C, 5'-3'; reverse indicates N->C, 3'-5'. Offset: distance from start of RNA sequence to first PPR motif. Gap position: nucleotide at which gap introduced between protein motifs. Gap length: length of gap in nucleotides. 17-mer: position (from 1 to 35) within the PPR motifs used to constitute the 17-mer sequence of amino acids used for the alignment. P-value: probability that amino acids and nucleotides are arranged independently of each other, as calculated by Fisher's Exact Test. None of the 29400 alignments exceed the threshold for significance at the 5% level if a threshold corrected for the total number of tests is used (5% threshold using the Šidák correction = 1.74E-06).

| orientation | offset | gap position | gap length | 17-mer | p-value   |
|-------------|--------|--------------|------------|--------|-----------|
| forward     | 2      | 8            | 2          | 1      | 0.0001631 |
| forward     | 2      | 6            | 3          | 33     | 0.0006832 |
| reverse     | 1      | 5            | 4          | 14     | 0.0008227 |
| forward     | 3      | 13           | 1          | 25     | 0.001122  |
| forward     | 3      | 14           | 1          | 25     | 0.001122  |
| forward     | 3      | 15           | 1          | 25     | 0.001122  |
| forward     | 2      | 6            | 2          | 1      | 0.001168  |
| forward     | 1      | 2            | 3          | 8      | 0.001234  |
| reverse     | 1      | 9            | 5          | 8      | 0.001234  |
| reverse     | 1      | 10           | 5          | 8      | 0.001234  |
| forward     | 3      | 6            | 1          | 2      | 0.001272  |
| forward     | 3      | 7            | 1          | 2      | 0.001272  |
| forward     | 2      | 10           | 2          | 1      | 0.001283  |
| reverse     | 1      | 12           | 2          | 8      | 0.001508  |
| reverse     | 1      | 10           | 4          | 8      | 0.001618  |
| reverse     | 1      | 8            | 5          | 8      | 0.001848  |
| reverse     | 1      | 13           | 2          | 8      | 0.001892  |
| reverse     | 0      | 13           | 3          | 8      | 0.001892  |
| forward     | 1      | 4            | 3          | 2      | 0.001988  |
| forward     | 2      | 9            | 2          | 1      | 0.00202   |
| forward     | 2      | 2            | 3          | 21     | 0.002101  |
| forward     | 2      | 8            | 3          | 33     | 0.002143  |
| reverse     | 0      | 12           | 3          | 13     | 0.002236  |
| forward     | 4      | 2            | 1          | 21     | 0.002262  |
| forward     | 4      | 5            | 1          | 21     | 0.002262  |
| forward     | 4      | 6            | 1          | 21     | 0.002262  |
| reverse     | 3      | 10           | 2          | 21     | 0.002262  |
| forward     | 5      | 6            | 1          | 12     | 0.002342  |
| forward     | 5      | 7            | 1          | 12     | 0.002342  |
| reverse     | 2      | 9            | 3          | 16     | 0.002343  |
| reverse     | 0      | 12           | 3          | 8      | 0.002345  |
| reverse     | 0      | 7            | 2          | 30     | 0.002458  |
| reverse     | 2      | 8            | 3          | 16     | 0.002618  |
| reverse     | 1      | 6            | 4          | 14     | 0.002622  |
| forward     | 2      | 5            | 2          | 1      | 0.002766  |
| forward     | 3      | 3            | 3          | 3      | 0.002921  |
| forward     | 3      | 4            | 3          | 3      | 0.002921  |
| forward     | 3      | 15           | 2          | 25     | 0.002943  |
| forward     | 3      | 14           | 3          | 25     | 0.002943  |
| forward     | 3      | 15           | 3          | 25     | 0.002943  |
| reverse     | 1      | 11           | 4          | 8      | 0.002962  |
| reverse     | 3      | 7            | 2          | 21     | 0.003087  |

|         |   |    |   |    |          |
|---------|---|----|---|----|----------|
| forward | 4 | 7  | 2 | 23 | 0.003144 |
| reverse | 2 | 10 | 2 | 10 | 0.003156 |
| forward | 0 | 6  | 1 | 14 | 0.003686 |
| reverse | 0 | 7  | 3 | 17 | 0.003755 |
| reverse | 1 | 10 | 1 | 35 | 0.003959 |
| reverse | 1 | 11 | 1 | 35 | 0.003959 |
| reverse | 1 | 11 | 2 | 8  | 0.004072 |
| forward | 2 | 3  | 3 | 21 | 0.004105 |
| reverse | 0 | 10 | 5 | 8  | 0.004148 |
| reverse | 0 | 11 | 5 | 8  | 0.004148 |
| forward | 0 | 5  | 1 | 14 | 0.004178 |
| forward | 1 | 8  | 1 | 5  | 0.004202 |
| forward | 1 | 9  | 1 | 5  | 0.004202 |
| reverse | 3 | 8  | 3 | 15 | 0.004319 |
| reverse | 3 | 9  | 2 | 21 | 0.004363 |
| forward | 2 | 7  | 3 | 33 | 0.004477 |
| forward | 2 | 9  | 1 | 7  | 0.004548 |
| forward | 2 | 10 | 1 | 7  | 0.004548 |
| forward | 2 | 13 | 4 | 7  | 0.004548 |
| reverse | 0 | 14 | 5 | 25 | 0.004601 |
| reverse | 0 | 15 | 5 | 25 | 0.004601 |
| reverse | 3 | 8  | 2 | 21 | 0.004606 |
| reverse | 1 | 7  | 2 | 8  | 0.004628 |
| reverse | 0 | 7  | 3 | 8  | 0.004628 |
| forward | 3 | 2  | 1 | 8  | 0.004795 |
| forward | 2 | 2  | 2 | 8  | 0.004795 |
| forward | 2 | 3  | 2 | 8  | 0.004795 |
| forward | 1 | 3  | 3 | 8  | 0.004795 |
| forward | 3 | 8  | 2 | 6  | 0.004816 |
| forward | 2 | 5  | 1 | 28 | 0.005208 |
| forward | 2 | 6  | 1 | 28 | 0.005208 |
| reverse | 1 | 12 | 4 | 8  | 0.005389 |
| reverse | 1 | 13 | 4 | 8  | 0.005389 |
| reverse | 0 | 13 | 5 | 8  | 0.005389 |
| forward | 2 | 2  | 2 | 1  | 0.005535 |
| forward | 2 | 3  | 2 | 1  | 0.005535 |
| forward | 0 | 5  | 1 | 4  | 0.005624 |
| forward | 1 | 12 | 1 | 22 | 0.005638 |
| forward | 1 | 13 | 1 | 22 | 0.005638 |
| forward | 2 | 4  | 2 | 8  | 0.005768 |
| reverse | 0 | 12 | 5 | 8  | 0.005913 |
| forward | 3 | 5  | 3 | 3  | 0.006074 |
| forward | 3 | 10 | 1 | 2  | 0.006173 |
| forward | 3 | 11 | 1 | 2  | 0.006173 |
| forward | 5 | 8  | 1 | 12 | 0.00619  |
| forward | 5 | 9  | 1 | 12 | 0.00619  |
| forward | 1 | 12 | 1 | 8  | 0.006253 |
| forward | 1 | 13 | 1 | 8  | 0.006253 |
| forward | 1 | 6  | 2 | 28 | 0.006338 |
| reverse | 3 | 9  | 2 | 15 | 0.006486 |
| reverse | 0 | 11 | 3 | 13 | 0.006758 |
| reverse | 3 | 5  | 3 | 15 | 0.006787 |
| reverse | 3 | 6  | 3 | 15 | 0.006787 |
| reverse | 2 | 5  | 4 | 15 | 0.006787 |
| reverse | 0 | 15 | 1 | 8  | 0.007096 |
| forward | 2 | 14 | 1 | 7  | 0.00714  |

|         |   |    |   |   |          |
|---------|---|----|---|---|----------|
| forward | 2 | 15 | 1 | 7 | 0.00714  |
| reverse | 1 | 14 | 4 | 1 | 0.007143 |
