# Supplementary material for: A Combinatorial Amino Acid Code for RNA Recognition by Pentatricopeptide Repeat Proteins
Source: PubMed Central journal article supplement (PMC3420917; doi:10.1371/journal.pgen.1002910), 2012-08-16
Supplement: pgen.1002910.s004.pdf [file pgen.1002910.s004.pdf]

**Table S2. Correlations between amino acids at specific positions within PPR motifs and aligned nucleotides.** Contingency tables (amino acids *versus* nucleotides) were constructed from the alignments in Figure 2 and Figure S1. Each 20 x 4 table was tested for independent assortment of amino acids and nucleotides using a chi-squared test (after first removing any empty rows from the table). P-values from the tests are shown in the table, with those values that are significant for both P and S motifs highlighted (a 1% significance threshold was used, corrected for multiple tests using the Šidák correction). Rows: amino acid positions within the motifs. Columns: 0 indicates the motif aligned with the nucleotide, -1 the preceding motif, +1 the following motif.

|           | <b>P</b>  |          |           |  | <b>S</b>                   |          |           |
|-----------|-----------|----------|-----------|--|----------------------------|----------|-----------|
|           | <b>-1</b> | <b>0</b> | <b>+1</b> |  | <b>-1</b>                  | <b>0</b> | <b>+1</b> |
| <b>1</b>  | 1.68E-02  | 5.25E-01 | 5.02E-08  |  | 1.74E-02                   | 1.43E-01 | 1.43E-10  |
| <b>2</b>  | 1.22E-01  | 6.93E-02 | 3.68E-02  |  | 3.49E-04                   | 4.67E-01 | 9.23E-02  |
| <b>3</b>  | 2.63E-01  | 9.30E-03 | 8.42E-04  |  | 4.08E-04                   | 1.01E-05 | 5.24E-02  |
| <b>4</b>  | 1.92E-01  | 1.25E-01 | 4.03E-07  |  | 2.51E-04                   | 1.11E-01 | 2.15E-07  |
| <b>5</b>  | 7.14E-05  | 5.68E-01 | 1.19E-01  |  | 2.29E-02                   | 2.09E-03 | 6.16E-02  |
| <b>6</b>  | 3.93E-01  | 6.93E-28 | 5.59E-01  |  | 1.34E-02                   | 5.75E-12 | 1.70E-01  |
| <b>7</b>  | 2.69E-04  | 9.65E-02 | 1.89E-02  |  | 1.67E-01                   | 5.27E-01 | 2.03E-02  |
| <b>8</b>  | 1.80E-02  | 1.00E-01 | 2.22E-01  |  | 2.03E-03                   | 6.77E-03 | 1.99E-02  |
| <b>9</b>  | 2.50E-01  | 3.85E-03 | 8.12E-02  |  | 1.82E-04                   | 3.06E-03 | 5.39E-02  |
| <b>10</b> | 9.14E-04  | 4.55E-02 | 1.01E-02  |  | 3.55E-01                   | 1.93E-03 | 1.58E-01  |
| <b>11</b> | 2.24E-01  | 6.35E-02 | 4.60E-01  |  | 3.49E-02                   | 7.75E-02 | 4.42E-02  |
| <b>12</b> | 3.47E-03  | 8.28E-03 | 6.21E-01  |  | 3.14E-04                   | 3.33E-01 | 1.65E-01  |
| <b>13</b> | 2.32E-01  | 3.45E-02 | 2.80E-01  |  | 5.34E-02                   | 3.32E-01 | 3.20E-04  |
| <b>14</b> | 5.42E-02  | 4.59E-03 | 7.16E-02  |  | 1.98E-03                   | 8.92E-02 | 1.40E-03  |
| <b>15</b> | 3.41E-02  | 2.59E-03 | 1.98E-01  |  | 8.24E-01                   | 6.76E-01 | 7.67E-03  |
| <b>16</b> | 4.27E-02  | 6.01E-01 | 2.06E-01  |  | 4.77E-01                   | 2.91E-01 | 3.84E-01  |
| <b>17</b> | 1.94E-02  | 1.72E-01 | 9.16E-01  |  | 5.52E-02                   | 1.03E-01 | 4.35E-02  |
| <b>18</b> | 8.29E-03  | 1.17E-01 | 9.39E-02  |  | 5.12E-01                   | 2.46E-01 | 2.16E-01  |
| <b>19</b> | 1.61E-01  | 5.41E-01 | 4.40E-03  |  | 3.95E-02                   | 1.72E-01 | 1.43E-03  |
| <b>20</b> | 1.57E-01  | 1.78E-01 | 1.51E-01  |  | 2.18E-04                   | 3.74E-03 | 1.07E-01  |
| <b>21</b> | 2.26E-02  | 1.22E-01 | 8.41E-04  |  | 2.55E-02                   | 6.81E-02 | 4.50E-02  |
| <b>22</b> | 7.73E-02  | 1.73E-01 | 1.24E-01  |  | 7.52E-02                   | 7.30E-01 | 1.85E-01  |
| <b>23</b> | 6.00E-03  | 2.83E-03 | 3.29E-01  |  | 3.60E-01                   | 1.60E-01 | 2.05E-03  |
| <b>24</b> | 4.57E-01  | 2.07E-04 | 3.53E-01  |  | 5.97E-04                   | 1.71E-01 | 2.80E-01  |
| <b>25</b> | 5.61E-01  | 1.20E-02 | 1.27E-01  |  | 1.42E-01                   | 1.56E-01 | 2.85E-02  |
| <b>26</b> | 1.27E-02  | 1.60E-05 | 8.81E-02  |  | 4.57E-03                   | 5.87E-02 | 3.60E-02  |
| <b>27</b> | 2.26E-02  | 7.69E-02 | 3.82E-02  |  | 6.66E-03                   | 8.42E-03 | 7.56E-02  |
| <b>28</b> | 6.61E-02  | 4.08E-02 | 4.06E-03  |  | 3.62E-01                   | 2.46E-01 | 1.60E-01  |
| <b>29</b> | 3.88E-02  | 1.62E-02 | 6.03E-02  |  | 1.59E-02                   | 8.14E-01 | 3.77E-02  |
| <b>30</b> | 2.07E-01  | 7.95E-03 | 4.96E-01  |  | 1.51E-02                   | 6.21E-02 | 9.96E-02  |
| <b>31</b> | 1.00E-01  | 4.61E-02 | 1.10E-02  |  | 1.04E-01                   | 2.74E-01 | 1.48E-01  |
| <b>32</b> | 2.83E-01  | 2.14E-01 | 3.58E-03  |  |                            |          |           |
| <b>33</b> | 5.85E-01  | 1.88E-02 | 1.07E-01  |  | 1% significance threshold: |          | 1.08E-04  |

|           | <b>P</b>                   |          |           |  | <b>S</b>  |          |           |
|-----------|----------------------------|----------|-----------|--|-----------|----------|-----------|
|           | <b>-1</b>                  | <b>0</b> | <b>+1</b> |  | <b>-1</b> | <b>0</b> | <b>+1</b> |
| <b>34</b> | 7.49E-03                   | 3.72E-01 | 3.56E-02  |  |           |          |           |
| <b>35</b> | 8.29E-02                   | 5.43E-01 | 1.61E-03  |  |           |          |           |
|           |                            |          |           |  |           |          |           |
|           | 1% significance threshold: |          | 9.57E-05  |  |           |          |           |
