# Supplementary material for: A Combinatorial Amino Acid Code for RNA Recognition by Pentatricopeptide Repeat Proteins
Source: PubMed Central journal article supplement (PMC3420917; doi:10.1371/journal.pgen.1002910), 2012-08-16
Supplement: pgen.1002910.s005.pdf [file pgen.1002910.s005.pdf]

## P motifs

### A

| 6 | 1' | A  | C  | G  | U  | p-value  |
|---|----|----|----|----|----|----------|
| T | D  | 2  | 0  | 23 | 1  | 9.70E-18 |
| T | N  | 23 | 0  | 2  | 0  | 1.34E-14 |
| N | D  | 7  | 22 | 7  | 68 | 2.09E-09 |
| N | N  | 6  | 46 | 3  | 31 | 2.39E-06 |
| S | N  | 10 | 1  | 0  | 1  | 3.42E-06 |
| N | S  | 1  | 12 | 0  | 3  | 1.50E-04 |
| T | T  | 0  | 0  | 3  | 0  | 5.59E-04 |
| S | S  | 5  | 1  | 0  | 0  | 1.02E-03 |
| S | R  | 0  | 0  | 2  | 0  | 4.84E-03 |
| S | C  | 2  | 0  | 0  | 0  | 1.21E-02 |
| R | D  | 0  | 0  | 0  | 3  | 1.38E-02 |
| T | S  | 3  | 0  | 0  | 1  | 2.01E-02 |
| N | R  | 0  | 2  | 0  | 0  | 2.63E-02 |
| A | D  | 0  | 0  | 2  | 1  | 3.56E-02 |
| G | D  | 0  | 1  | 2  | 0  | 3.56E-02 |
| H | M  | 0  | 0  | 0  | 2  | 4.43E-02 |
| H | S  | 0  | 0  | 0  | 2  | 4.43E-02 |
| N | C  | 0  | 5  | 0  | 3  | 5.06E-02 |
| F | G  | 1  | 0  | 0  | 0  | 7.62E-02 |
| G | H  | 1  | 0  | 0  | 0  | 7.62E-02 |
| G | S  | 1  | 0  | 0  | 0  | 7.62E-02 |
| S | G  | 1  | 0  | 0  | 0  | 7.62E-02 |
| S | L  | 1  | 0  | 0  | 0  | 7.62E-02 |
| T | P  | 1  | 0  | 0  | 0  | 7.62E-02 |
| H | V  | 2  | 0  | 0  | 1  | 8.66E-02 |
| G | N  | 0  | 1  | 0  | 0  | 1.16E-01 |
| N | T  | 1  | 8  | 0  | 8  | 1.19E-01 |
| N | G  | 1  | 2  | 0  | 5  | 1.35E-01 |
| A | N  | 2  | 2  | 0  | 0  | 1.96E-01 |
| M | D  | 0  | 1  | 1  | 0  | 2.22E-01 |
| N | E  | 0  | 0  | 1  | 1  | 2.22E-01 |
| T | R  | 1  | 0  | 1  | 0  | 2.22E-01 |
| S | D  | 4  | 3  | 3  | 1  | 2.34E-01 |
| C | S  | 0  | 1  | 0  | 2  | 2.88E-01 |
| I | D  | 1  | 0  | 1  | 1  | 3.89E-01 |

### B

| 6 | R  | Y   | p-value  |
|---|----|-----|----------|
| T | 59 | 2   | 1.16E-25 |
| N | 27 | 216 | 4.10E-17 |
| S | 28 | 7   | 3.36E-08 |
| G | 4  | 2   | 1.09E-01 |
| C | 0  | 3   | 1.11E-01 |
| R | 0  | 3   | 1.11E-01 |
| F | 1  | 0   | 1.45E-01 |
| A | 4  | 3   | 2.22E-01 |
| I | 2  | 1   | 2.57E-01 |
| M | 1  | 1   | 6.53E-01 |
| H | 2  | 5   | 7.38E-01 |

## S motifs

### C

| 6 | 1' | A  | C  | G  | U  | p-value  |
|---|----|----|----|----|----|----------|
| T | D  | 9  | 2  | 27 | 4  | 4.72E-14 |
| S | D  | 1  | 1  | 13 | 1  | 1.16E-09 |
| S | N  | 20 | 2  | 1  | 5  | 8.69E-09 |
| T | N  | 18 | 1  | 2  | 3  | 1.25E-08 |
| N | D  | 5  | 13 | 5  | 44 | 1.20E-06 |
| C | N  | 3  | 0  | 0  | 0  | 2.13E-03 |
| N | T  | 0  | 12 | 3  | 4  | 2.14E-03 |
| N | N  | 5  | 8  | 9  | 5  | 9.80E-03 |
| G | S  | 2  | 0  | 0  | 0  | 1.21E-02 |
| A | R  | 0  | 2  | 0  | 0  | 2.63E-02 |
| T | H  | 1  | 0  | 2  | 0  | 3.56E-02 |
| C | D  | 0  | 0  | 1  | 0  | 4.64E-02 |
| G | D  | 0  | 0  | 1  | 0  | 4.64E-02 |
| P | C  | 0  | 0  | 1  | 0  | 4.64E-02 |
| A | H  | 1  | 0  | 0  | 0  | 7.62E-02 |
| S | E  | 1  | 0  | 0  | 0  | 7.62E-02 |
| T | E  | 1  | 0  | 0  | 0  | 7.62E-02 |
| T | K  | 1  | 0  | 0  | 0  | 7.62E-02 |
| S | K  | 2  | 0  | 1  | 0  | 8.66E-02 |
| T | L  | 2  | 0  | 0  | 1  | 8.66E-02 |
| L | D  | 0  | 1  | 0  | 0  | 1.16E-01 |
| N | E  | 0  | 1  | 0  | 0  | 1.16E-01 |
| A | T  | 0  | 0  | 0  | 1  | 1.55E-01 |
| F | N  | 0  | 0  | 0  | 1  | 1.55E-01 |
| I | N  | 0  | 0  | 0  | 1  | 1.55E-01 |
| P | N  | 0  | 0  | 0  | 1  | 1.55E-01 |
| S | S  | 0  | 0  | 0  | 1  | 1.55E-01 |
| T | Q  | 0  | 0  | 0  | 1  | 1.55E-01 |
| V | S  | 0  | 0  | 0  | 1  | 1.55E-01 |
| K | D  | 0  | 2  | 1  | 0  | 1.79E-01 |
| N | H  | 0  | 2  | 0  | 1  | 1.79E-01 |
| A | D  | 0  | 0  | 1  | 1  | 2.22E-01 |
| T | S  | 1  | 3  | 1  | 1  | 2.83E-01 |
| A | N  | 1  | 0  | 0  | 1  | 3.60E-01 |
| T | T  | 1  | 1  | 1  | 0  | 3.89E-01 |
| N | S  | 2  | 4  | 1  | 5  | 7.06E-01 |

### D

| 6 | R  | Y  | p-value  |
|---|----|----|----------|
| T | 67 | 17 | 2.72E-16 |
| S | 39 | 10 | 4.24E-10 |
| N | 30 | 99 | 4.32E-08 |
| C | 4  | 0  | 4.55E-02 |
| A | 3  | 5  | 8.33E-02 |
| G | 3  | 0  | 8.33E-02 |
| K | 1  | 2  | 3.17E-01 |
| P | 1  | 1  | 3.17E-01 |
| F | 0  | 1  | 1.00E+00 |
| I | 0  | 1  | 1.00E+00 |
| L | 0  | 1  | 1.00E+00 |
| V | 0  | 1  | 1.00E+00 |

**Table S3. Correlations between amino acids at positions 6, 1' and aligned nucleotides.** The tables show frequencies of co-occurrence of amino acids and nucleotides from the alignments in Fig. 2 and Fig. S1. **A:** P motifs, positions 6, 1' versus each nucleotide; **B:** S motifs, positions 6, 1' versus each nucleotide; **C:** P motifs, position 6 versus purines (R), pyrimidines (Y); **D:** S motifs, position 6 versus purines (R), pyrimidines (Y). P-values were calculated using G-tests. P-values in **A** and **B** are for the most positively correlated nucleotide. Significance was evaluated at 5% allowing for multiple testing (using the Šidák correction). Green shading indicates significantly correlated, magenta shading indicates significantly anti-correlated.
